# Supplementary material for: Micro and macroevolution of sea anemone venom phenotype
Source: PubMed Central journal article supplement (PMC9842752; doi:10.1038/s41467-023-35794-9), 2023-01-16
Supplement: 41467_2023_35794_MOESM3_ESM.pdf [file 41467_2023_35794_MOESM3_ESM.pdf]

## **Description of Additional Supplementary Files**

**Supplementary Data 1.** Sea anemone comparative transcriptomics and completeness.

**Supplementary Data 2.** Toxin expression matrix among sea anemones. Act = Actinioidea, Met = Metridioidea, Edw = Edwardsioidea

**Supplementary Data 3.** Phylogenetic covariance analysis of toxin expression among sea anemones. NS = Not significant.

**Supplementary Data 4.** Phylogenetic signal and model of evolution on toxin expression in sea anemones. Brownian motion (BM), Ornstein–Uhlenbeck (OU), or early burst (EB) models

**Supplementary Data 5.** Phylogenetic covariance analysis and fitting tissue type as a fixed effect, showing that the confidence intervals overlap zero.

**Supplementary Data 6.** Toxin copy number in sea anemone genomes identified using BLASTp with KTx3 and NaTx highlighted in cyan as those identified manually.

**Supplementary Data 7.** Macrosynteny of the number of single-copy orthologs (SCO) shared among sea anemones genomes.

**Supplementary Data 8.** NEP3 and NEP6 genome loci in sea anemones genomes

**Supplementary Data 9.** Percent identity for NaTx and KTx3 genes within sea anemones genomes.

**Supplementary Data 10.** Population transcriptomics for *Nematostella vectensis* representing sequencing depth and completeness.

**Supplementary Data 11.** Gene expression of *Nv1* and other toxins in *Nematostella vectensis* from different populations. A) A matrix of known toxin genes mapped to reference *Nematostella vectensis* from different populations B) nCounter normalized data of *Nv1* expression and housekeeping genes from different populations at different temperatures.

**Supplementary Data 12.** Raw quantification cycle values and estimated *Nv1* copy number for *N. vectensis* individuals from five populations along the Atlantic Coast of North America.

**Supplementary Data 13.** Results of two-way ANOVA (one-tailed test) testing the effect of population and plate on estimates of diploid *Nv1* copy number

**Supplementary Data 14.** Post hoc test results for *Nv1* diploid copy number across populations. Absolute difference in mean copy number is shown above the diagonal and the p-value from the Tukey-Kramer test controlling for family-wise error rate ( $\alpha = 0.05$ ) below the diagonal

**Supplementary Data 15.** Semi-quantitative proteomic results from two Florida and North Carolina populations of *Nematostella vectensis*.

**Supplementary Data 16.** Perseus statistical analysis performed using semi-quantitative proteomic results from Florida and North Carolina populations of *Nematostella vectensis*.

**Supplementary Data 17.** Raw data used for linear regression analysis comparing the semi-quantitative proteomic results from two Florida and North Carolina populations of *Nematostella vectensis*.

**Supplementary Data 18.** Read information for reads spanning *Nv1* haplotypes.

**Supplementary Data 19.** Transposable element annotations generated by EDTA spanning the *Nv1* locus and 20kb up- and downstream for the Nova Scotia, Florida, and Maryland assemblies.
